# Supplementary material for: Tobacco Use and Awareness of Health-Related Risks among 7,213 Adolescents living in Sicily (Italy): A Cross-Sectional Survey-Based Study
Source: Research Square preprint supplement (doi:10.21203/rs.3.rs-8444619/v1), 2026-01-16
Supplement: Supplementary file 1 [file ec28875aed1457c473d32e79.docx]

**Tobacco Use and Awareness of Health-Related Risks among 7,213 Adolescents living in Sicily (Italy): A Cross-Sectional Survey-Based Study**

**Supplementary Material**

*Multiple Correspondence Analysis*

Based on the eigenvalues, the number of retained dimensions is equal to six because they collectively explain approximately 44.5% of the total variance in the data (Dim 1 = 14.7%, Dim 2 = 7.1%, Dim 3 = 6.6%, Dim 4 = 6.1%, Dim 5 = 5.6%, Dim 6 = 4.4%). Given the categorical nature of the variables and the complexity of the survey data, this proportion of explained variance was deemed adequate for exploratory purposes. Additional dimensions contributed marginally to the overall inertia and were not considered further.

To interpret the results of the MCA, let evaluate the relevance and quality of each variable and category in defining the extracted dimensions: *η²* indicates the proportion of variance in a dimension that is explained by a variable; high values (typically >0.5) suggest that a variable plays a major role in shaping that dimension; *coordinates* represent the position of each category on the axes and define its contribution to the meaning of the dimension (positive and negative values show the direction and strength of the association); *cos²* measures the quality of representation of a category on a given dimension (values close to 1 indicate that the category is well represented and relevant for interpreting that axis); *v.test* values quantify how significantly a category contributes to a dimension, with larger absolute values indicating greater distinctiveness or contrast; lastly, *contribution* measures the relative importance of each category in the construction of each dimension.

Resuming, each dimension is defined by the highest contribution of variables (*η²*); thus, the categories with the highest *contributions* and supported by their positions (*coordinates*), representational quality (*cos2*), and statistical distinctiveness (*v.test*).

| η² | **Dim 1** | **Dim 2** | **Dim 3** | **Dim 4** | **Dim 5** | **Dim 6** |
| --- | --- | --- | --- | --- | --- | --- |
| **What do you smoke?** | 0,902 | 0,060 | 0,196 | 0,075 | 0,002 | 0,023 |
| **When do you currently smoke?** | 0,870 | 0,095 | 0,479 | 0,171 | 0,006 | 0,006 |
| **If you smoke, what led you to start smoking?** | 0,869 | 0,068 | 0,023 | 0,019 | 0,001 | 0,041 |
| **How many cigarettes do you smoke per day?** | 0,870 | 0,112 | 0,416 | 0,152 | 0,010 | 0,001 |
| **Do you think that vaping is less dangerous than smoking tobacco cigarettes?** | 0,039 | 0,009 | 0,047 | 0,004 | 0,019 | 0,119 |
| **Has your family talked with you about the risks related to smoking?** | 0,004 | 0,070 | 0,078 | 0,012 | 0,014 | 0,361 |
| **Have you been taught at school about the risks associated with smoking?** | 0,021 | 0,063 | 0,022 | 0,010 | 0,004 | 0,421 |
| **Overall risk perception** | 0,214 | 0,721 | 0,287 | 0,618 | 0,735 | 0,167 |
| **Maximum perceived risk category** | 0,170 | 0,714 | 0,234 | 0,597 | 0,726 | 0,052 |

Dimension 1 clearly captures **current tobacco use behaviours,** distinguishing among product types (tobacco, electronic, both, none), smoking frequency, intensity, and initial motivation. This is a behavioural dimension reflecting **actual usage patterns and i**t separates heavy daily smokers, often driven by boredom or social reasons, from non-smokers and occasional users. Categories with the highest contributions include “Everyday” smokers (v.test = 59.0, coord = 2.32, cos² = 0.54), “More than 5 cigarettes/day” (v.test = 54.8, coord = 2.35), and reasons such as “Fun and games” (v.test = 45.7). These are opposed to “Never” smokers and those who report no use. The η² values confirm the dominant influence of variables like "What do you smoke?" (0.90) and "How many cigarettes do you smoke per day?" (0.87).

Dimension 2 focuses on the **perception of health risks** associated with smoking, including general, oral, and dental health. It highlights a **cognitive-perceptual layer** distinct from actual behavior, separating those who perceive high risk from those who minimize or ignore it. Strongly characterized by perception of health risks, especially among those who cannot identify a specific risk category ("nessuna categoria massima"), and educational exposure variables. Highest v.test values are found in “No risk perceived” (v.test = 44.0) and “Nessuna categoria massima” (v.test = 67.0). Responses such as “I do not know” from school/family education questions have high positive coordinates and cos² (e.g., school = 0.42). High η² values for Overall risk perception (0.72) and Maximum perceived risk category (0.71) confirm the weight of cognitive-perceptual content. This dimension differentiates informed vs. uninformed individuals.

Dimension 3 links **smoking intensity**with**risk perception,** possibly identifying individuals who smoke heavily but deny the risk versus light smokers who perceive high danger. It's an axis of **inconsistency or coherence between risk awareness and behavior.** Categories such as “More than 5 cigarettes/day” (coord = –1.86, v.test = –43.4) are placed opposite to “Electric cigarette” users with high perceived risk (coord = 1.54, v.test = 27.7).

Dimension 4 reflects **how individuals cognitively construct and express risk**. It likely separates those who rationalize or internalize risk in specific ways, regardless of behavior. Individuals scoring high here tend to associate smoking with systemic and oral damage, regardless of their actual smoking behavior. It reflects a subjective health schema linked to general awareness. The key contributions come from "rischio = Generale" (coord = 4.47, v.test = 53.6) and "categoria massima = 4" (coord = 3.63, v.test = 58.5). Although weaker, the fourth dimension seems to reflect the influence of social context. Motivations related to peer or family influence (“Be like friends”, “Parents and/or siblings smoke”) contribute more prominently, suggesting an axis of environmental or relational influence.

Dimension 5 can be interpreted as**informational awareness**, it distinguishes respondents based on the specificity and clarity of their knowledge. High positive scores (e.g., rischio = 5, v.test = 63.4) correspond to individuals who can articulate concrete consequences (e.g., oral health). Negative scores are associated with general or vague responses. High cos² for “Bocca” (0.52) and “Denti” (0.22) confirms their representational quality. E-cigarette perceptions also play a role (e.g. “Vaping is not dangerous”: 0.65%), jointly “I don’t know” which aligns uncertain perception of the risks related to electronic cigarette use.

Dimension 6 clearly reflects **educational and informational background,** distinguishing individuals who were **formally or informally educated**about smoking risks from those who were not. It helps reveal how **exposure to health education** may shape attitudes and behaviors. This dimension isolates respondents who consistently select "I do not know" regarding perceived risks and educational exposure. Categories such as “I do not know – school” (coord = 2.81, cos² = 0.42, v.test = 51.8) and “I do not know – family” (coord = 2.09, cos² = 0.36, v.test = 48.0) anchor the positive side of this axis. High η² for these variables (>0.72) confirm that lack of clarity and disengagement strongly shape this latent dimension.

| Dimension | Label |
| --- | --- |
| 1 | Smoking Behavior |
| 2 | Perceived Health Risk |
| 3 | Risk–Behavior Coherence |
| 4 | Risk Internalization |
| 5 | Vaping and Alternative Risk Perception |
| 6 | Educational Background on Risk |
